# Supplementary material for: Lean thinking: using 6S and visual management for efficient adverse event closure
Source: PubMed Central journal article supplement — BMJ Open Qual. 2021 Jan 26;10(1):e001197. doi: 10.1136/bmjoq-2020-001197 (PMC7843323; doi:10.1136/bmjoq-2020-001197), 2021-01-26
Supplement: bmjoq-2020-001197supp001.pdf [file bmjoq-2020-001197supp001.pdf]

**Appendix 1 : ORIENTATION CHECKLIST**

| <b>Item</b>                                                   | <b>Date Completed</b> | <b>Initial</b> |
|---------------------------------------------------------------|-----------------------|----------------|
| <b>I. Required Administrative Policy and Procedures (APP)</b> |                       |                |
| APP # (xxx): Safety Reporting System (SRS)                    |                       |                |
| APP # (xxx): Sentinel Events And Root Cause Analysis          |                       |                |
| APP # (xxx): Serious Incident Reporting System                |                       |                |
| <b>II. Safety Reporting System (SRS)</b>                      |                       |                |
| <b>A. Report an Incident</b>                                  |                       |                |
| - How to submit a report                                      |                       |                |
| <b>B. Manage an Incident</b>                                  |                       |                |
| 1. How to retrieve a Relevant Information                     |                       |                |
| 2. How to review a relevant file                              |                       |                |
| 3. How to document a follow-up action                         |                       |                |
| 4. How to assign or complete a task                           |                       |                |
| 5. How to close a relevant file                               |                       |                |
| <b>C. Generate Reports</b>                                    |                       |                |
| 1. How to modify a basic report                               |                       |                |
| 2. How to use the report editor                               |                       |                |
| 3. How to filter data using expression editor                 |                       |                |
| 4. How to create a basic bar chart report                     |                       |                |
| 5. How to create an advance bar chart                         |                       |                |
| 6. How to create a basic line chart report                    |                       |                |
| 7. How to create an advanced line chart report                |                       |                |
| 8. How to make a basic simple list report                     |                       |                |
| 9. How to make an advanced simple list report                 |                       |                |
| 10. Learning check                                            |                       |                |
| <b>D. Others:</b>                                             |                       |                |

**Note:** Include the printed certificates after the completion of each training module.
